# Supplementary material for: Solvent effect on the 77Se NMR chemical shifts of diphenyl diselenides
Source: Royal Society of Chemistry journal article supplement (doi:10.1039/d3nj05149h), 2024-01-01
Supplement: d3nj05149h1.xlsx [file d3nj05149h1.xlsx]

## Sheet: Solvent
		Deuterated Solvent	Dipole Moment	Water Solubility	pKa	pKaH negative values
		Benzene-d6	0.00	0.8 g/L	43.00
		CDCl3	1.04	8.0 g/L	13.60
		CD3OD	1.70	full	15.5
		CD3CO2H	1.74	full	4.75
		THF-d8	1.75	full	----	2.08
		Py-d5	2.30	full	----	5.25
		CD3CN	3.20	full	25.00
		DMSO-d6	3.96	full	35.00

## Sheet: PhSeSePh
			Deuterated Solvent	77Se Chemical Shift	1H Chem Shift ortho position	1H Chem Shift meta/para
			Benzene-d6	460	7.50	6.88
			CDCl3	463	7.61	7.25
			CD3OD	458	7.59	7.26
			CD3CO2H	456	7.67	7.30
			THF-d8	455	7.60	7.23
			Py-d5	456	7.73	7.23
			CD3CN	456	7.63	7.30
			DMSO-d6	448	8.14	7.82
			Temperature (˚C)	77Se Chemical Shift	77Se Chemical Shift
				DMSO-d6	C6D6
			25	448	460
			35	450	462
			45	453	465
			55	455	467

## Sheet: PhSe(metaCF3)
				Deuterated Solvent	77Se Chemical Shift	1H Chem Shift Singlet ortho CF3 and Se	1H Chem Shift Triplete meta CF3 and Se
				Benzene-d6	476	7.72	6.60
				CDCl3	476	7.84	7.40
				CD3OD	472	7.87	7.49
				CD3CO2H	471	7.90	7.48
				THF-d8	467	7.95	7.48
				Py-d5	473	8.08	7.37
				CD3CN	469	7.91	7.50
				DMSO-d6	462	7.94	7.58

## Sheet: PhSe(paraFluoride)
				Deuterated Solvent	77Se Chemical Shift	1H Chem Shift meta Fluoride	1H Chem Shift ortho Fluoride
				Benzene-d6	489	7.20	6.53
				CDCl3	492	7.54	6.97
				CD3OD	486	7.59	7.03
				CD3CO2H	483	7.60	7.03
				THF-d8	484	7.60	7.04
				Py-d5	484	7.67	7.07
				CD3CN	481	7.62	7.06
				DMSO-d6	471	7.65	7.20

## Sheet: PhSe(orthoOMe)
					Deuterated Solvent	77Se Chemical Shift	1H Chem Shift ortho Se	1H Chem Shift ortho Ome
					Benzene-d6	325	7.82	6.32
					CDCl3	333	7.55	6.81
					CD3OD	321	7.44	6.91
					CD3CO2H	323	7.50	6.87
					THF-d8	319	7.46	6.88
					Py-d5	327	7.79	6.89
					CD3CN	325	7.50	6.94
					DMSO-d6	323	7.40	7.01

## Sheet: PhSe(paraOMe)
				Deuterated Solvent	77Se Chemical Shift	1H Chem Shift ortho Se	1H Chem Shift ortho Ome
				Benzene-d6	505	7.51	6.55
				CDCl3	505	7.50	6.80
				CD3OD	501	7.46	6.83
				CD3CO2H	496	7.50	6.83
				THF-d8	501	7.47	6.82
				Py-d5	499	7.69	6.92
				CD3CN	494	7.51	6.86
				DMSO-d6	488	7.50	6.91

## Sheet: PhSe(o,o,p-Me)
				Deuterated Solvent	77Se Chemical Shift	1H ortho, ortho Me	1H para Me	1H Aromatic
				Benzene-d6	368	2.32	2.03	6.68
				CDCl3	370	2.24	2.26	6.83
				DMSO-d6	366	2.17	2.23	6.91
				DMSO-d6 / Temperature	77Se Chemical Shift	1H ortho, ortho Me	1H para Me	1H Aromatic
				25	366	2.17	2.23	6.91
				35	368	2.18	2.23	6.90
				45	369	2.19	2.23	6.89
				55	371	2.20	2.23	6.88
				Benzene-d6 / Temperature	77Se Chemical Shift	1H ortho, ortho Me	1H para Me	1H Aromatic
				25.0 ºC	368	2.32	2.03	6.68
				35.0 ºC	369	2.32	2.04	6.69
				45.0 ºC	371	2.32	2.05	6.70
				55.0 ºC	372	2.32	2.06	6.71
									448
									450
									453
									455

## Sheet: PhSe(orthoChloride)
	Deuterated Solvent	77Se Chemical Shift	1H Chem Shift ortho position	1H Chem Shift meta/para
	Benzene-d6	392	7.69	6.85
	CDCl3	393	7.79	7.20
	CD3OD	389	7.78	7.19
	CD3CO2H	389	7.87	7.26
	THF-d8	389	7.78	7.16
	Py-d5	398	7.97	7.18
	CD3CN	395	7.82	7.24
	DMSO-d6	400	7.80	7.23

## Sheet: PhSe(paraChloride)
					Deuterated Solvent	77Se Chemical Shift	1H Chem Shift ortho position	1H Chem Shift meta/para
					Benzene-d6	472	7.69	6.85
					CDCl3	474	7.79	7.20
					CD3OD	467	7.78	7.19
					CD3CO2H	465	7.87	7.26
					THF-d8	465	7.78	7.16
					Py-d5	468	7.97	7.18
					CD3CN	464	7.82	7.24
					DMSO-d6	453	7.80	7.23

## Sheet: PhSe(m,m-CF3)
									Deuterated Solvent
									Benzene-d6	491
									CDCl3	486
									DMSO-d6	482
									Temperature (˚C)	77Se Chemical Shift	77Se Chemical Shift
										DMSO-d6	C6D6
									25	482	491
									35	484	493
									45	486	495
									55	488	497
