# Supplementary material for: Solvent effect on the 77Se NMR chemical shifts of diphenyl diselenides
Source: Royal Society of Chemistry journal article supplement (doi:10.1039/d3nj05149h), 2024-01-01
Supplement: d3nj05149h2.pdf [file d3nj05149h2.pdf]

*Supplementary information*

**Solvent Effect on the  $^{77}\text{Se}$  NMR Chemical Shift of Diphenyl  
Diselenides**

Laboratório de Síntese Orgânica Limpa – LASOL, Universidade Federal de Pelotas – UFPel, Campus  
Capão do Leão, 96160-000, Capão do Leão-RS, Brazil.

Dipartimento di Scienze Chimiche, Università degli Studi di Padova, Via Marzolo 1, 35131, Padova,  
Italy.

Corresponding author: [silva.ms@ufpel.edu.br](mailto:silva.ms@ufpel.edu.br)

***Table of Contents***

|                                                                                                                                                             |                   |
|-------------------------------------------------------------------------------------------------------------------------------------------------------------|-------------------|
| <b><i>General information</i></b>                                                                                                                           | <b><i>S2</i></b>  |
| <b><i><math>^{77}\text{Se}</math> NMR analyses in distinct deuterated solvents</i></b>                                                                      | <b><i>S2</i></b>  |
| <b><i><math>^{77}\text{Se}\{^1\text{H}\}</math> and <math>^{77}\text{Se}</math> NMR chemical shifts recorded in different concentrations</i></b>            | <b><i>S3</i></b>  |
| <b><i>Additional Computational Material</i></b>                                                                                                             | <b><i>S4</i></b>  |
| <b><i>Selected <math>^{77}\text{Se}</math> NMR Spectra</i></b>                                                                                              | <b><i>S6</i></b>  |
| <b><i><math>^1\text{H}</math>, <math>^{13}\text{C}</math> and <math>^{77}\text{Se}</math> NMR Spectra of <math>(p\text{-CH}_3\text{OPhSe})_2</math></i></b> | <b><i>S14</i></b> |
| <b><i>Cartesian Coordinates of gas phase optimized <math>(\text{MeSe})_2</math> and <math>(\text{PhSe})_2</math></i></b>                                    | <b><i>S16</i></b> |
| <b><i>Linear Correlation Between the Computed and Experimental Chemical Shift</i></b>                                                                       | <b><i>S17</i></b> |

## ***General Information***

Proton nuclear magnetic resonance spectra ( $^1\text{H}$  NMR) were recorded at 400 MHz on a Bruker Avance III HD spectrometer. Chemical shifts ( $\delta$ ) are reported in ppm, and the abbreviations to denote the multiplicity of a particular signal are s (singlet), d (doublet), t (triplet), q (quartet), quint (quintet), sext (sextet), td (triple doublet) and m (multiplet). NMR data are reported as follows: chemical shift ( $\delta$ ), multiplicity, coupling constant ( $J$ ) in Hertz and integrated intensity.  $^1\text{H}$  NMR chemical shifts were referenced to the tetramethylsilane (TMS; 0.0 ppm) internal standard.  $^{77}\text{Se}$  NMR spectra were obtained at 76.3 MHz and referenced to the diphenyl diselenide ( $\text{C}_6\text{H}_5\text{SeSeC}_6\text{H}_5$ ; 463.0 ppm) external standard employing the substitution method (IUPAC). Spectra were recorded in either  $\text{CDCl}_3$ ,  $\text{D}_3\text{CCN}$ ,  $\text{Py-}d_5$ ,  $\text{C}_6\text{D}_6$ ,  $\text{D}_3\text{COD}$ ,  $\text{D}_3\text{CCO}_2\text{H}$ ,  $\text{THF-}d_8$  or  $\text{DMSO-}d_6$  solutions. The NMR analyses of chalcogenide nuclides were carried out in a  $^1\text{H}$ -decoupled pulse sequence, *zgpg* for  $^{77}\text{Se}$  and coupled pulse sequence, *zg* for  $^{77}\text{Se}$  (Bruker Pulse Sequences). The  $\text{CDCl}_3$ ,  $\text{D}_3\text{CCN}$ ,  $\text{Py-}d_5$ ,  $\text{C}_6\text{D}_6$ ,  $\text{D}_3\text{COD}$ ,  $\text{D}_3\text{CCO}_2\text{D}$ ,  $\text{THF-}d_8$  or  $\text{DMSO-}d_6$  deuterated solvents were purchased from Sigma-Aldrich (Merck). The diaryl diselenides and diphenyl ditelluride were prepared according to the literature.<sup>1</sup>

### ***$^{77}\text{Se}$ NMR analyses in distinct deuterated solvents***

Diphenyl diphenyl diselenide (5.0 mg) was added in a vial followed by addition of the respective deuterated solvent (700  $\mu\text{L}$ ). The vial was then mixed and put into an NMR tube (5 mm) and the NMR analyses were carried at 25°C. The chemical shifts were referenced by substitution method,<sup>2,3</sup> derived from the standard chemical shift of diphenyl ditelluride or diphenyl diselenide in  $\text{CDCl}_3$  recorded individually for each sample before the NMR analysis into specific deuterated solvent.

### ***$^{77}\text{Se}\{^1\text{H}\}$ and $^{77}\text{Se}$ NMR chemical shifts recorded in different concentrations***

---

<sup>1</sup> N. Petragani, H. A. Stefani, *Tetrahedron*, **2005**, *61*, 1613.

<sup>2</sup> R. K. Harris, E. D. Becker, S. M. C. De Menezes, R. Goodfellow, P. Granger, *Pure and Applied Chemistry*, **2001**, *73*(11), 1795.

<sup>3</sup> R. K. Harris, E. D. Becker, S. M. C. De Menezes, P. Granger, R. E. Hoffman, K. W. Zilm, *Pure and Applied Chemistry*, **2008**, *80*(1), 59.

Diphenyl diselenide (mg - amount was varied according to the concentration) was added in a vial followed by addition of the respective deuterated solvent (700  $\mu\text{L}$ ). The vial was then mixed and put into an NMR tube (5 mm) alongside with a coaxial tube (external reference) containing diphenyl diselenide in the concentration used in the analyses of deuterated solvent (5.0 mg in 700  $\mu\text{L}$ ). Three aliquots were added into the deuterated solvent media to evaluate the  $^{77}\text{Se}$  NMR chemical shift sensitivity. The NMR analyses were carried at 25°C in a decoupled ( $^{77}\text{Se}\{^1\text{H}\}$ ) and coupled ( $^{77}\text{Se}$ ) NMR pulse sequences.

**Table S1:** Effect on the  $^{77}\text{Se}$  NMR chemical shifts of diphenyl diselenide in distinct concentrations.<sup>a,b,c</sup>

| Entry          | (PhSe) <sub>2</sub> in CDCl <sub>3</sub><br>[mg/700 $\mu\text{L}$ ] <sup>a</sup> | $^{77}\text{Se}$ Chemical Shift<br>(ppm) | $^{77}\text{Se}$ $\Delta\delta$<br>(ppm) |
|----------------|----------------------------------------------------------------------------------|------------------------------------------|------------------------------------------|
| 1              | 10.0                                                                             | 463.0                                    | 0                                        |
| 2              | 50.0                                                                             | 463.0                                    | 0                                        |
| 3              | 100.0                                                                            | 463.0                                    | 0                                        |
| 4 <sup>d</sup> | 10.0                                                                             | 463.0                                    | 0                                        |
| 5 <sup>d</sup> | 50.0                                                                             | 463.0                                    | 0                                        |
| 6 <sup>d</sup> | 100.0                                                                            | 463.0                                    | 0                                        |

<sup>a</sup> It was used the 5.0 mg of diphenyl diselenid in CDCl<sub>3</sub> as external standard in the substitution method (IUPAC); <sup>b</sup> NMR analyses were performed at 25°C; <sup>c</sup> Spectra are contained in the Figures S9, S10, S11, S12, S13 and S14; <sup>d</sup>  $^{77}\text{Se}$  NMR analyses were recorded employing the coupled NMR pulse sequence.

**Table S2:** Effect on the  $^{77}\text{Se}$  NMR chemical shifts of diphenyl diselenide in distinct concentrations and temperatures.<sup>a</sup>

| Entry | (PhSe) <sub>2</sub> in DMSO- <i>d</i> <sub>6</sub><br>[mg/700μL] | Temperature (°C) | $^{77}\text{Se}$ Chemical Shift<br>(ppm) | $^{77}\text{Se}$ $\Delta\delta$ (ppm) |
|-------|------------------------------------------------------------------|------------------|------------------------------------------|---------------------------------------|
| 1     | 10.0                                                             | 25               | 448.0                                    | 0                                     |
| 2     | 10.0                                                             | 35               | 450.0                                    | +2                                    |
| 3     | 10.0                                                             | 45               | 453.0                                    | +5                                    |
| 4     | 10.0                                                             | 55               | 455.0                                    | +7                                    |
| 5     | 100.0                                                            | 25               | 448.0                                    | 0                                     |
| 6     | 100.0                                                            | 35               | 450.0                                    | +2                                    |
| 7     | 100.0                                                            | 45               | 453.0                                    | +5                                    |
| 8     | 100.0                                                            | 55               | 455.0                                    | +7                                    |

<sup>a</sup> It was used the 5.0 mg of diphenyl diselenide in  $\text{CDCl}_3$  as external standard in the substitution method (IUPAC);

### Additional Computational Material

*Ab initio* molecular dynamics was carried out employing the ADMP method as implemented in Gaussian 16.[1–3] The OPBE density functional[4] combined with the large cc-pVTZ basis set was employed. ADMP was run with velocity scaling all the way through the simulation and checking the temperature (300 K) every five steps with a maximum allowed variation of 1 K. The simulation was carried out for 11000 steps of 0.1 fs each, i.e. for 1.1 ps total time. The first 100 fs were discarded, and the subsequent 1 ps of dynamics was considered for the calculation of the NMR shielding. Implicit solvent was employed in ADMP via the SMD solvation method[5], using either benzene or dimethylsulfoxide as solvent. To compute the  $^{77}\text{Se}$  shielding constant, 51 structures were generated taking snapshots from the AIMD trajectory every 20 fs. Chemical shifts were computed for both Se nuclei on each snapshot, employing the B3LYP density functional combined with cc-pVTZ basis set. Solvation was treated according to the continuum solvation model PCM,[6] using either benzene or dimethylsulfoxide as solvents. Shielding constants were averaged for the two Se nuclei, and also along the overall trajectory. Chemical shifts were computed using dimethylselenide as standard, for which the shielding constant was computed on the fully optimized geometry of the minimum employing the same level of theory above described. For diphenyldiselenide in benzene and dimethylsulfoxide, a chemical shift of 574 ppm and 585 was computed, respectively, in qualitative agreement with the discussion provided in the main text.

1. Schlegel, H.B.; Millam, J.M.; Iyengar, S.S.; Voth, G.A.; Daniels, A.D.; Scuseria, G.E.; Frisch, M.J. Ab Initio Molecular Dynamics: Propagating the Density Matrix with Gaussian Orbitals. *J. Chem. Phys.* **2001**, *114*, 9758–9763, doi:10.1063/1.1372182.
2. Iyengar, S.S.; Schlegel, H.B.; Millam, J.M.; A. Voth, G.; Scuseria, G.E.; Frisch, M.J. Ab Initio Molecular Dynamics: Propagating the Density Matrix with Gaussian Orbitals. II. Generalizations Based on Mass-Weighting, Idempotency, Energy Conservation and Choice of Initial Conditions. *J. Chem. Phys.* **2001**, *115*, 10291–10302, doi:10.1063/1.1416876.
3. Gaussian 16, Revision B.01.
4. Swart, M.; Ehlers, A.W.; Lammertsma \*, K. Performance of the OPBE Exchange-Correlation Functional. *Mol. Phys.* **2004**, *102*, 2467–2474, doi:10.1080/0026897042000275017.
5. Marenich, A. V.; Cramer, C.J.; Truhlar, D.G. Universal Solvation Model Based on Solute Electron Density and on a Continuum Model of the Solvent Defined by the Bulk Dielectric Constant and Atomic Surface Tensions. *J. Phys. Chem. B* **2009**, *113*, 6378–6396, doi:10.1021/jp810292n.
6. Scalmani, G.; Frisch, M.J. Continuous Surface Charge Polarizable Continuum Models of Solvation. I. General Formalism. *J. Chem. Phys.* **2010**, *132*, doi:10.1063/1.3359469.

## Selected $^{77}\text{Se}$ NMR Spectra

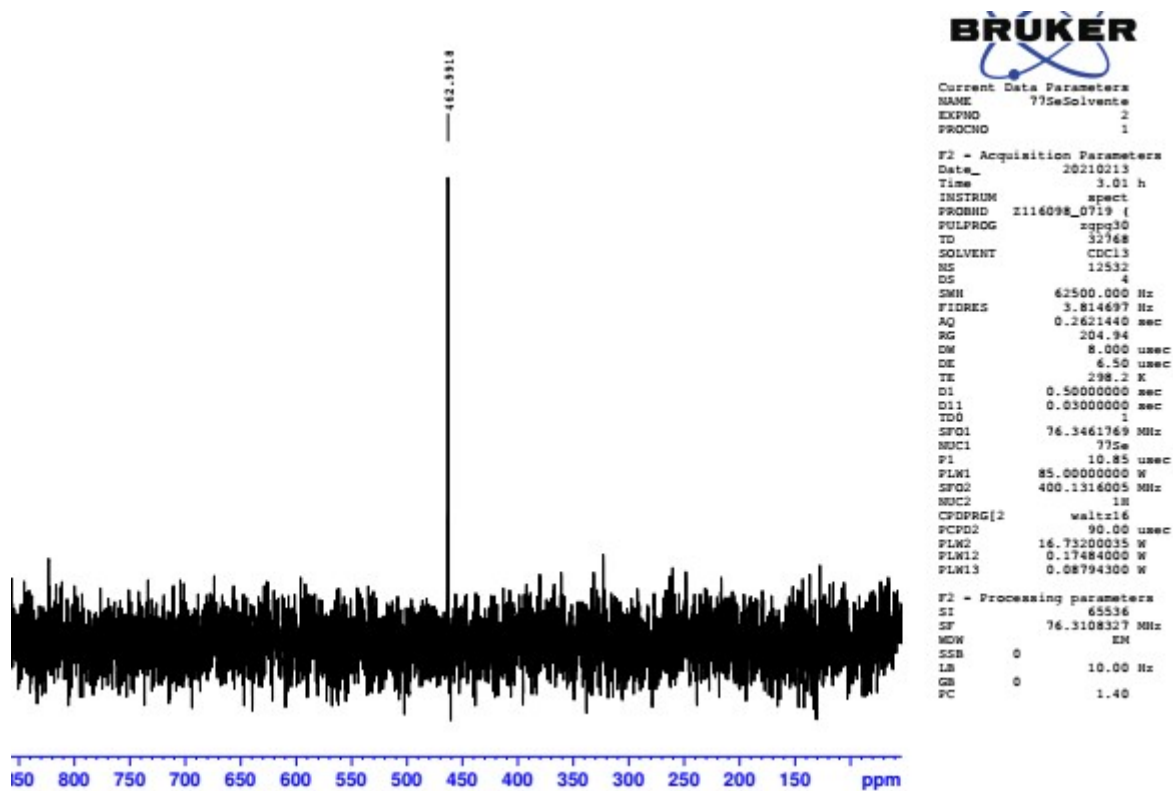

Figure S1:  $^{77}\text{Se}\{^1\text{H}\}$  NMR spectrum (76.3 MHz,  $\text{CDCl}_3$ ) of diphenyl diselenide.

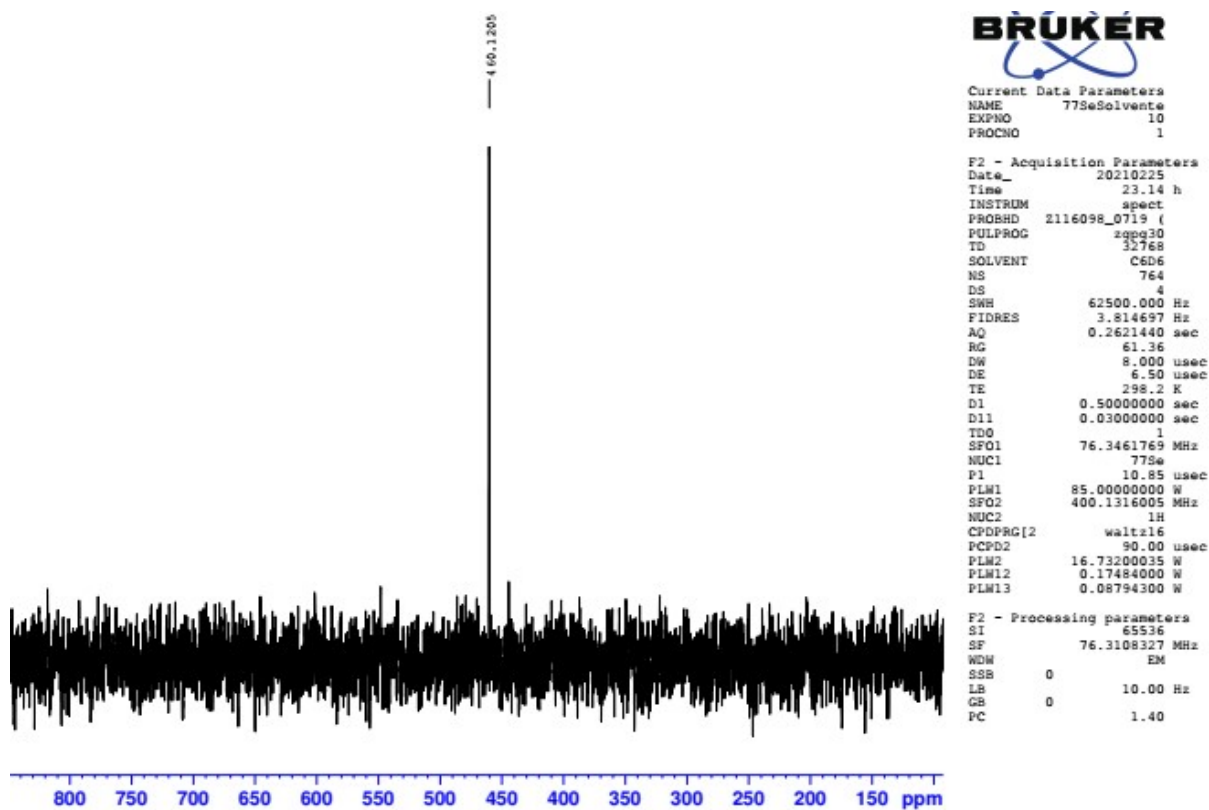

Figure S2:  $^{77}\text{Se}\{^1\text{H}\}$  NMR spectrum (76.3 MHz,  $\text{C}_6\text{D}_6$ ) of diphenyl diselenide.

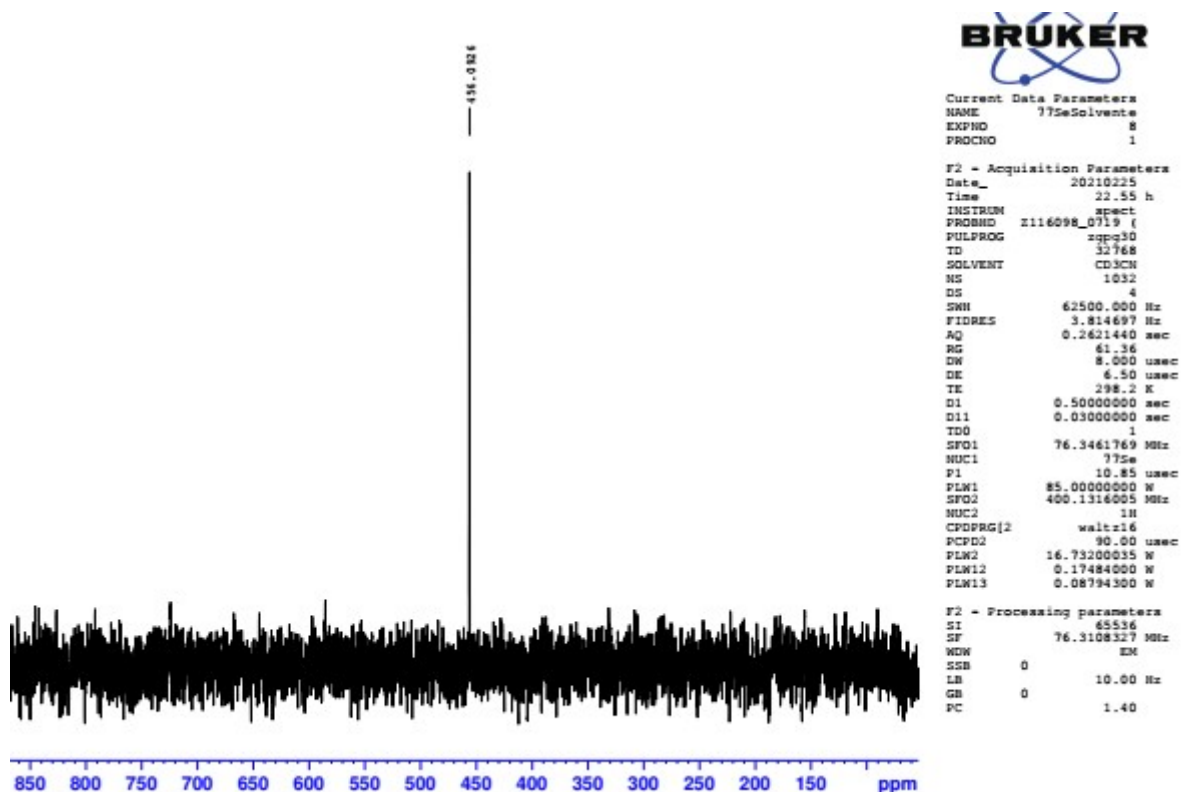

Figure S3:  $^{77}\text{Se}\{^1\text{H}\}$  NMR spectrum (76.3 MHz,  $\text{D}_3\text{CCN}$ ) of diphenyl diselenide.

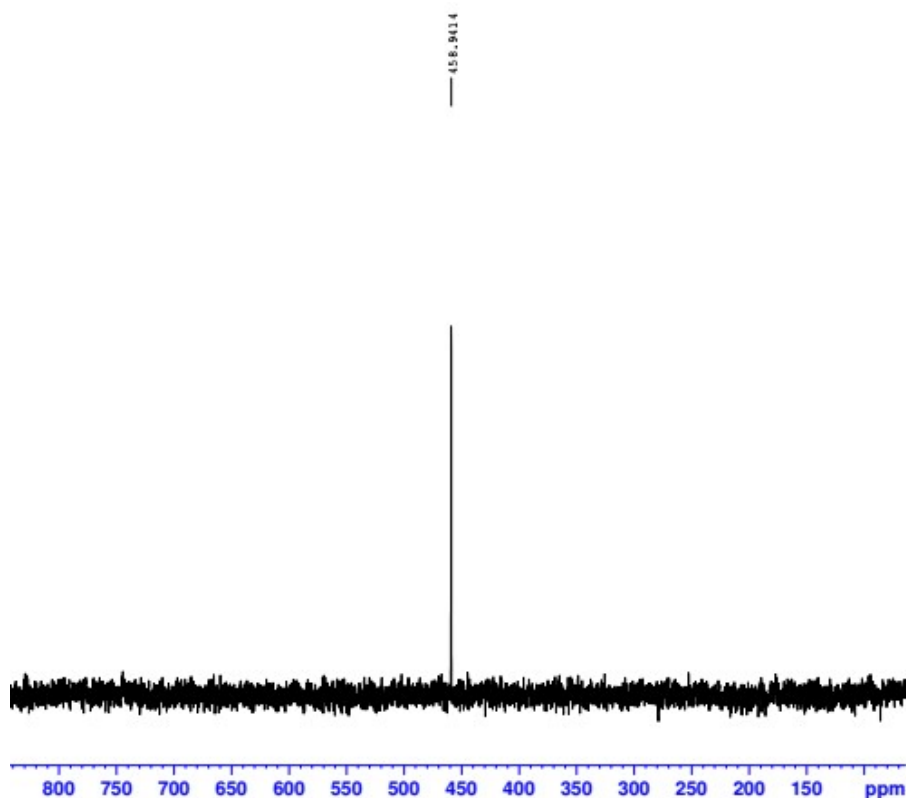

Figure S4:  $^{77}\text{Se}\{^1\text{H}\}$  NMR spectrum (76.3 MHz,  $\text{D}_3\text{COD}$ ) of diphenyl diselenide.

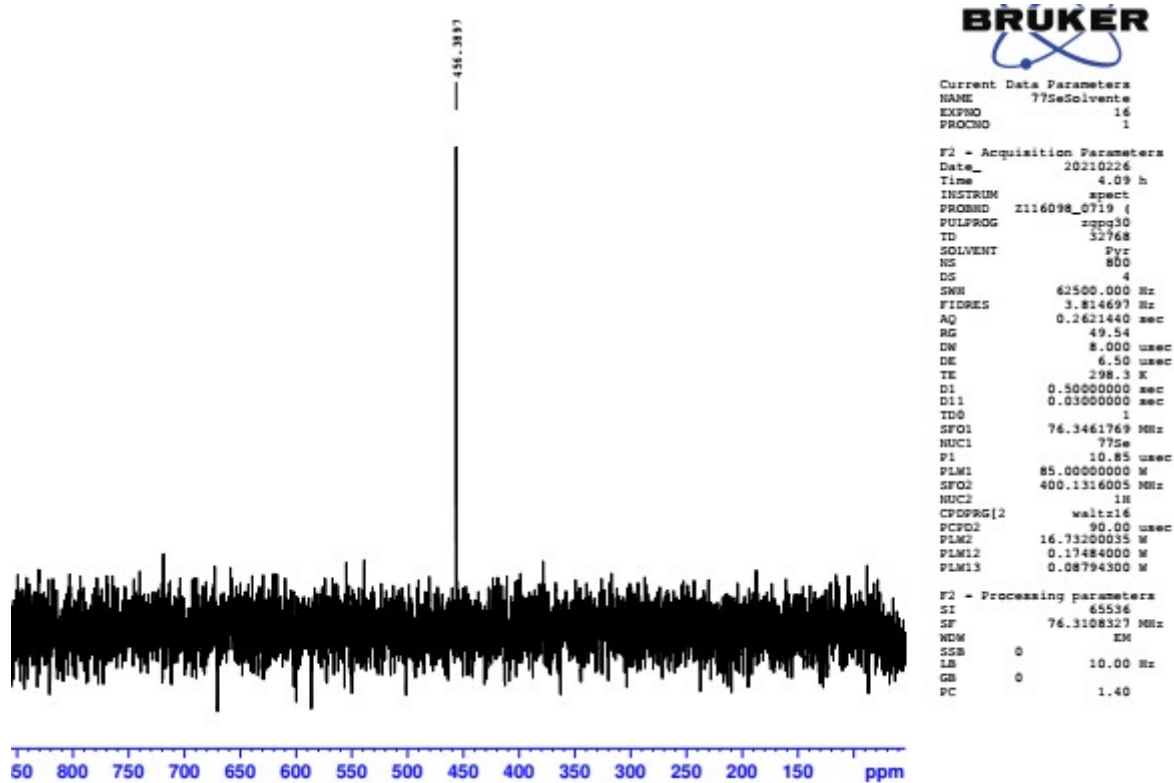

Figure S5:  $^{77}\text{Se}\{^1\text{H}\}$  NMR spectrum (76.3 MHz,  $\text{Py-d}_5$ ) of diphenyl diselenide.



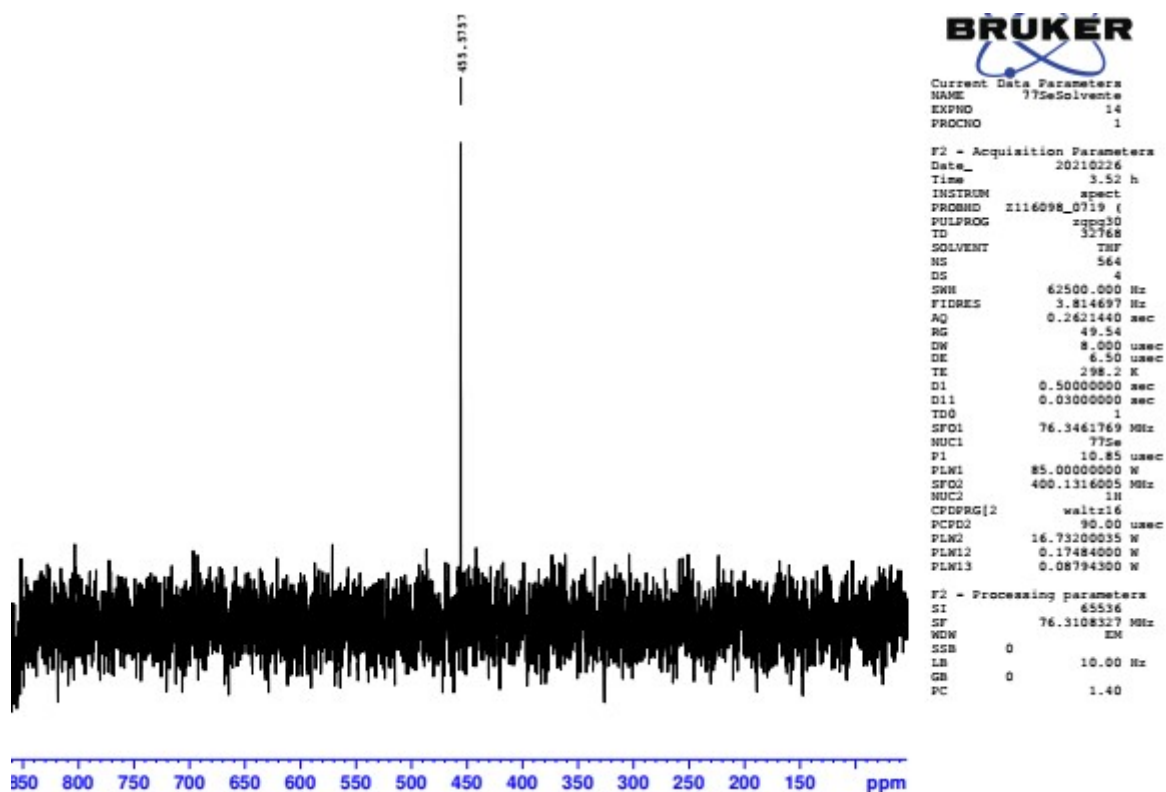

Figure S6:  $^{77}\text{Se}\{^1\text{H}\}$  NMR spectrum (76.3 MHz,  $\text{THF-}d_8$ ) of diphenyl diselenide.

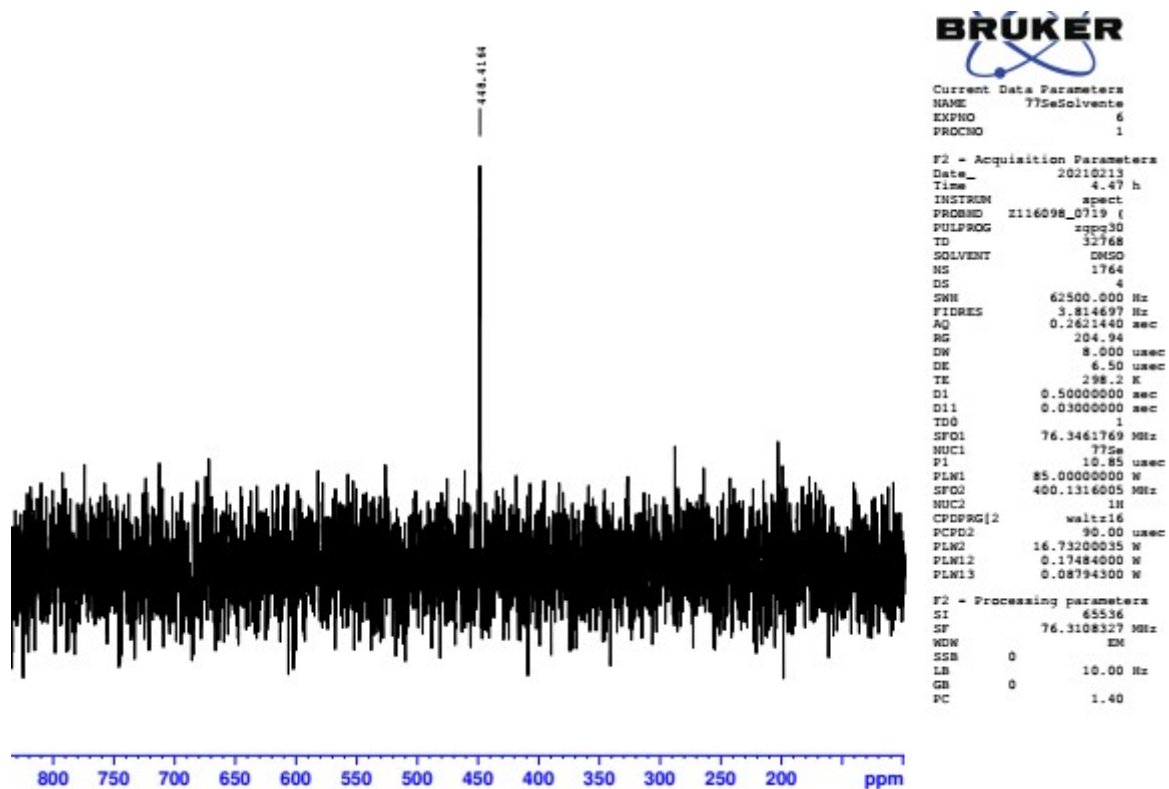

Figure S7:  $^{77}\text{Se}\{^1\text{H}\}$  NMR spectrum (76.3 MHz,  $\text{DMSO-}d_6$ ) of diphenyl diselenide.

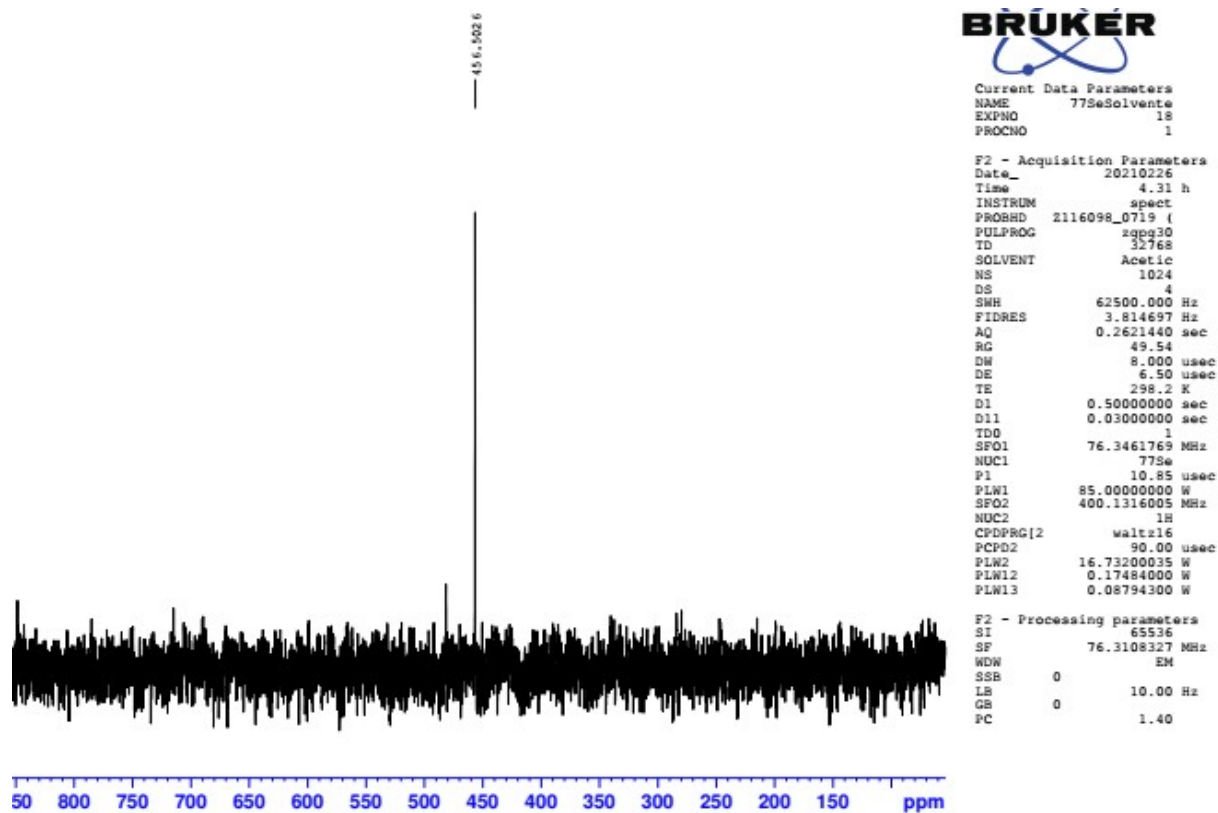

**Figure S8:**  $^{77}\text{Se}\{^1\text{H}\}$  NMR spectrum (76.3 MHz,  $\text{D}_3\text{CCO}_2\text{D}$ ) of diphenyl diselenide.

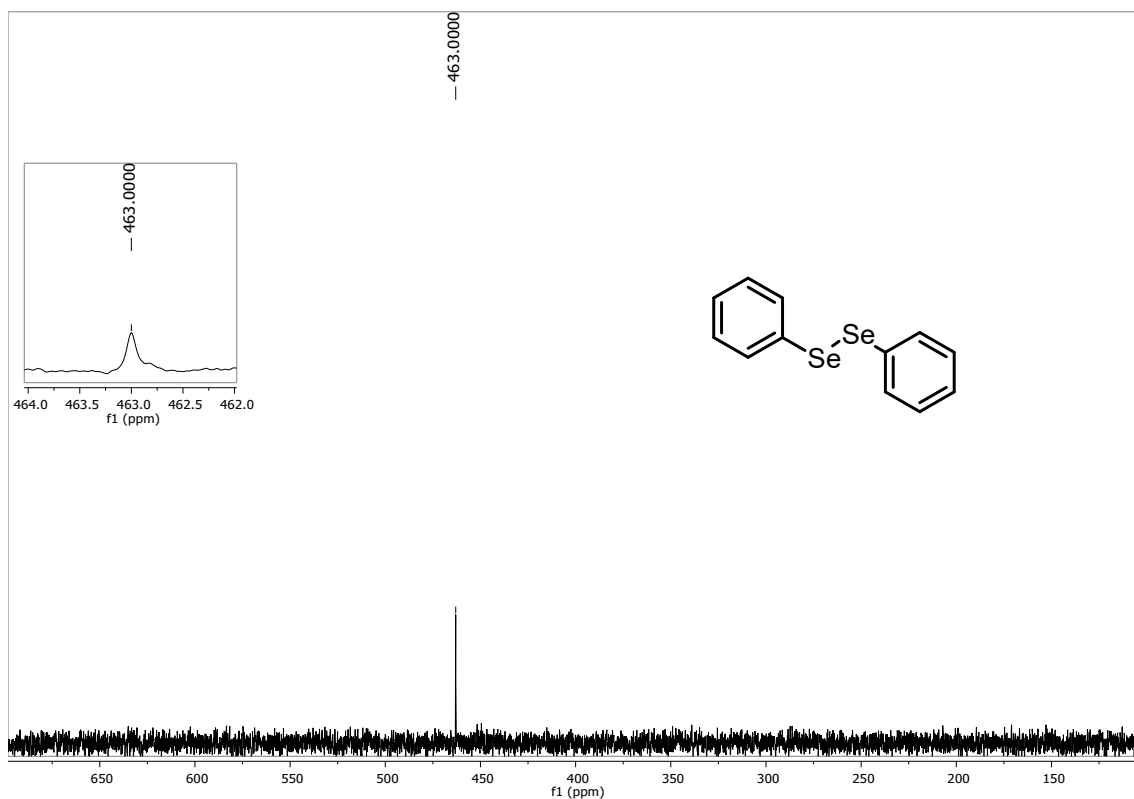

**Figure S9:**  $^{77}\text{Se}\{^1\text{H}\}$  NMR spectrum (76.3 MHz,  $\text{CDCl}_3$ ) of diphenyl diselenide (10.0 mg / 700  $\mu\text{L}$ ) referenced by an external standard of diphenyl diselenide (5.0 mg / 700  $\mu\text{L}$ ).

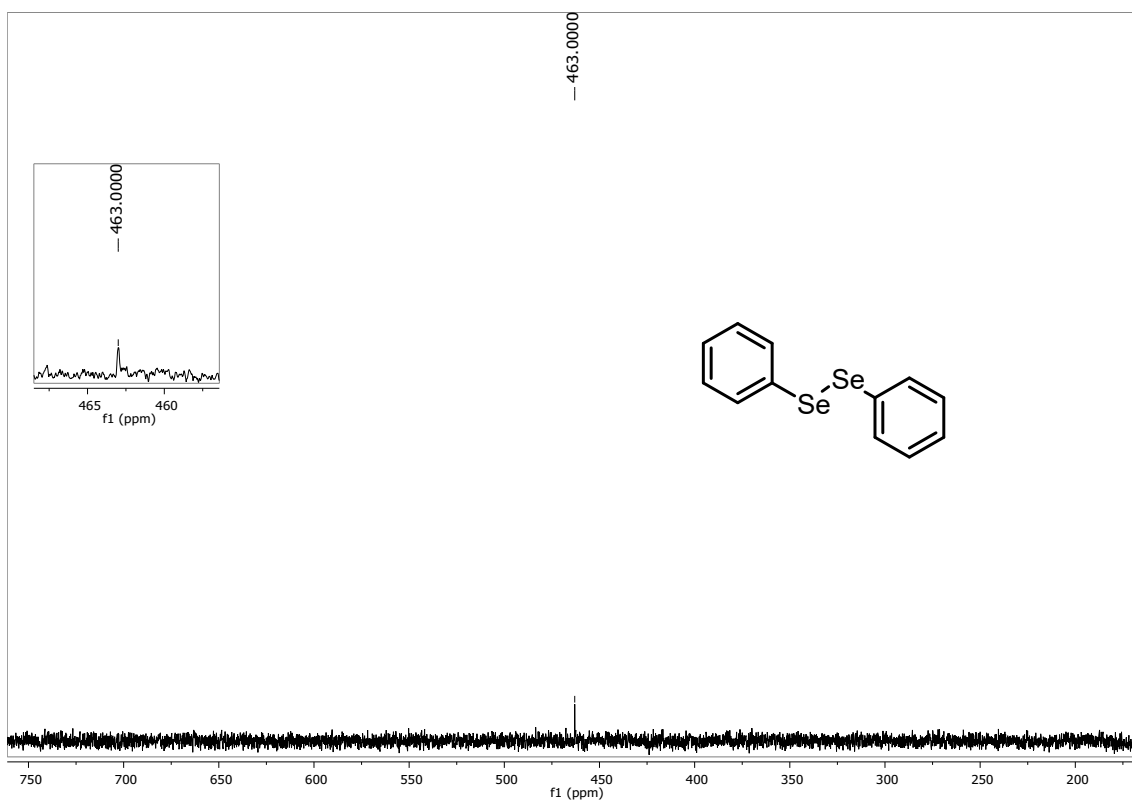

**Figure S10:**  $^{77}\text{Se}$  NMR spectrum (76.3 MHz,  $\text{CDCl}_3$ ) of diphenyl diselenide (10.0 mg / 700  $\mu\text{L}$ ) referenced by an external standard of diphenyl diselenide (5.0 mg / 700  $\mu\text{L}$ ).

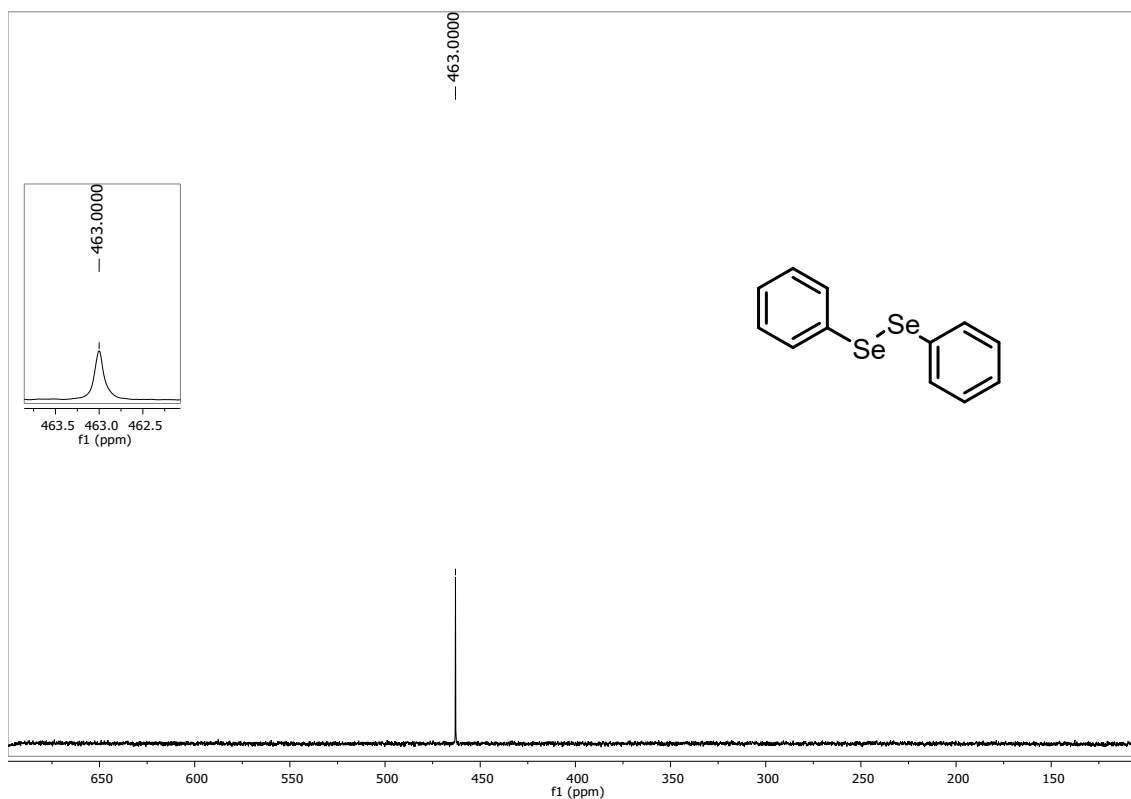

**Figure S11:**  $^{77}\text{Se}\{^1\text{H}\}$  NMR spectrum (76.3 MHz,  $\text{CDCl}_3$ ) of diphenyl diselenide (50.0 mg / 700  $\mu\text{L}$ ) referenced by an external standard of diphenyl diselenide (5.0 mg / 700  $\mu\text{L}$ ).

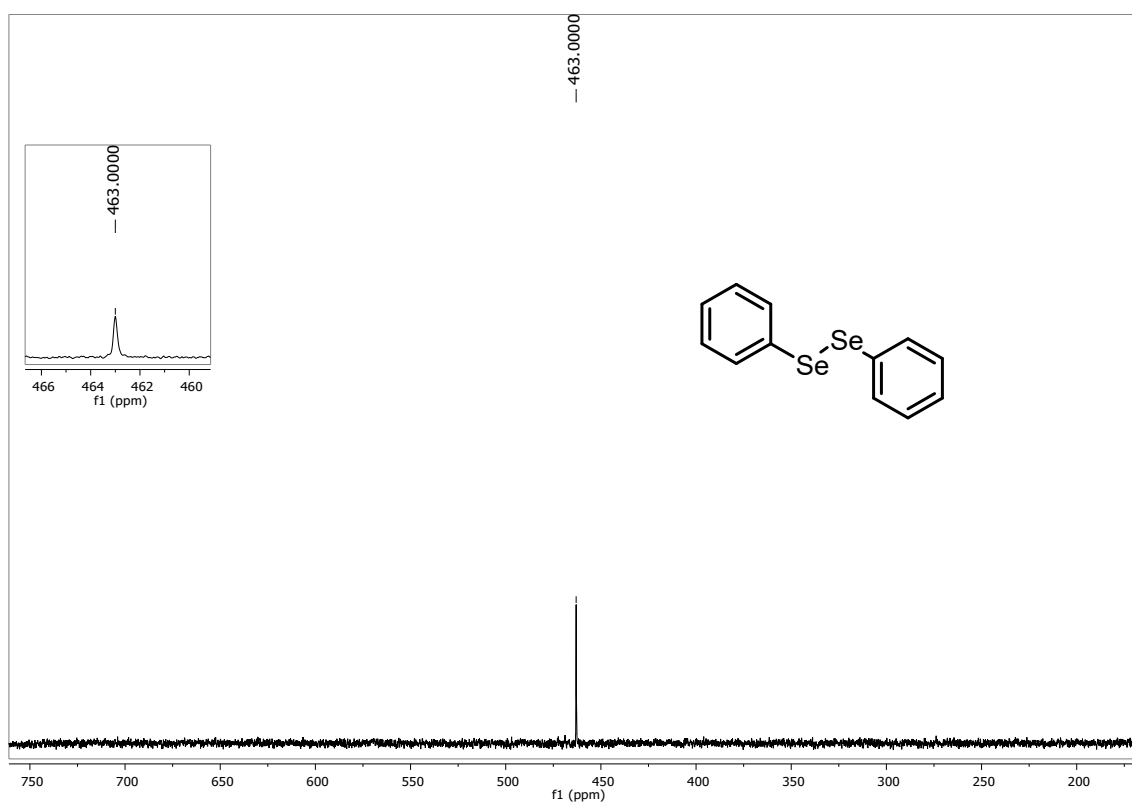

**Figure S12:**  $^{77}\text{Se}$  NMR spectrum (76.3 MHz,  $\text{CDCl}_3$ ) of diphenyl diselenide (50.0 mg / 700  $\mu\text{L}$ ) referenced by an external standard of diphenyl diselenide (5.0 mg / 700  $\mu\text{L}$ ).

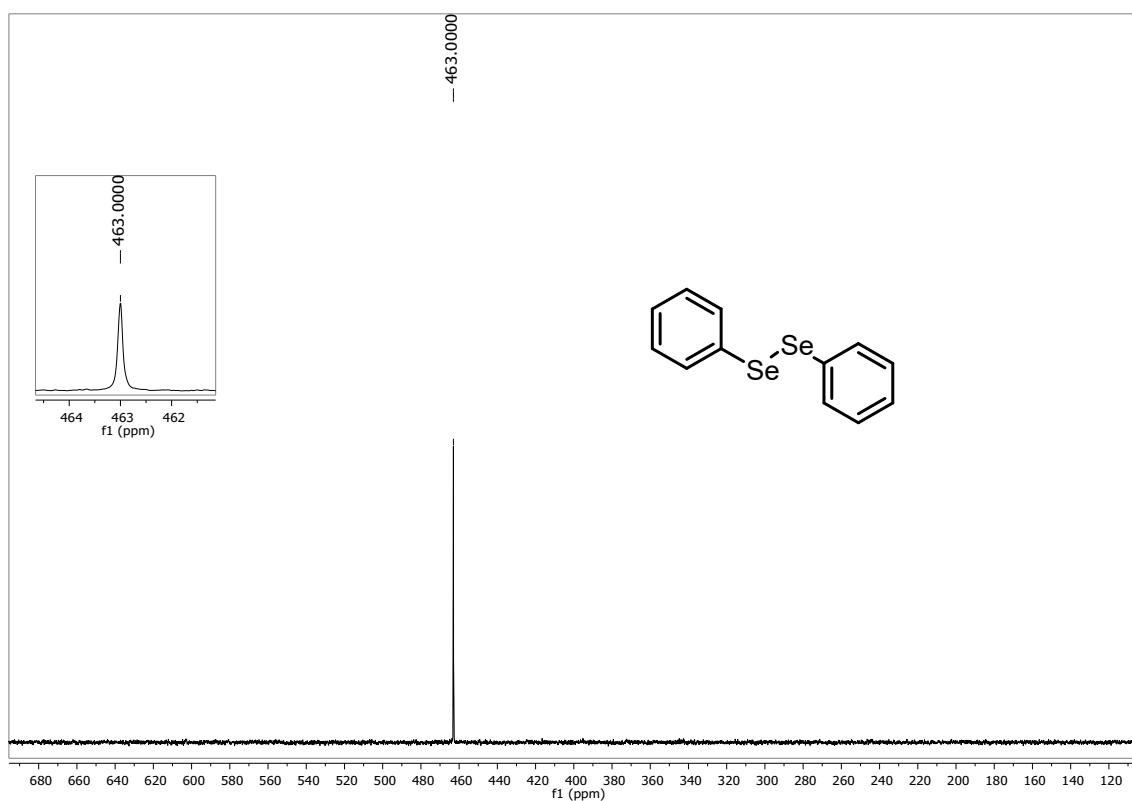

**Figure S13:**  $^{77}\text{Se}\{^1\text{H}\}$  NMR spectrum (76.3 MHz,  $\text{CDCl}_3$ ) of diphenyl diselenide (100.0 mg / 700  $\mu\text{L}$ ) referenced by an external standard of diphenyl diselenide (5.0 mg / 700  $\mu\text{L}$ ).

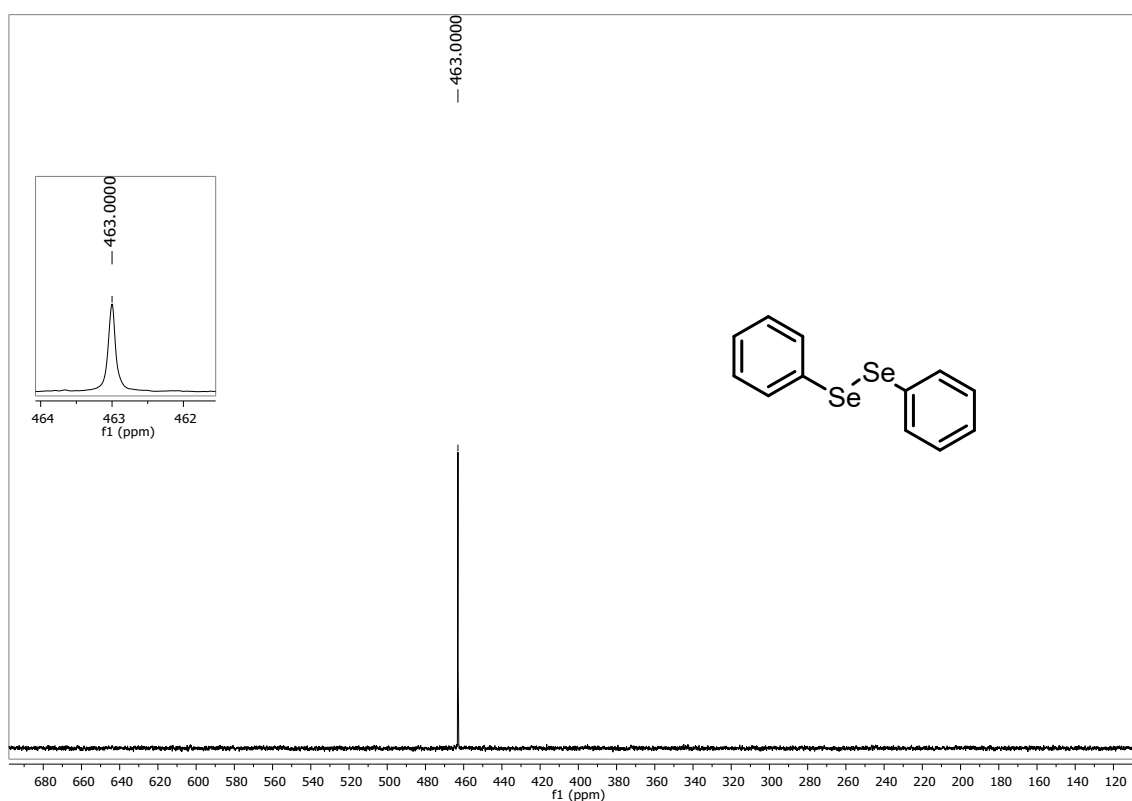

**Figure S14:**  $^{77}\text{Se}$  NMR spectrum (76.3 MHz,  $\text{CDCl}_3$ ) of diphenyl diselenide (100.0 mg / 700  $\mu\text{L}$ ) referenced by an external standard of diphenyl diselenide (5.0 mg / 700  $\mu\text{L}$ ).

***<sup>1</sup>H, <sup>13</sup>C and <sup>77</sup>Se NMR Spectra of (*p*-CH<sub>3</sub>OPhSe)<sub>2</sub>***

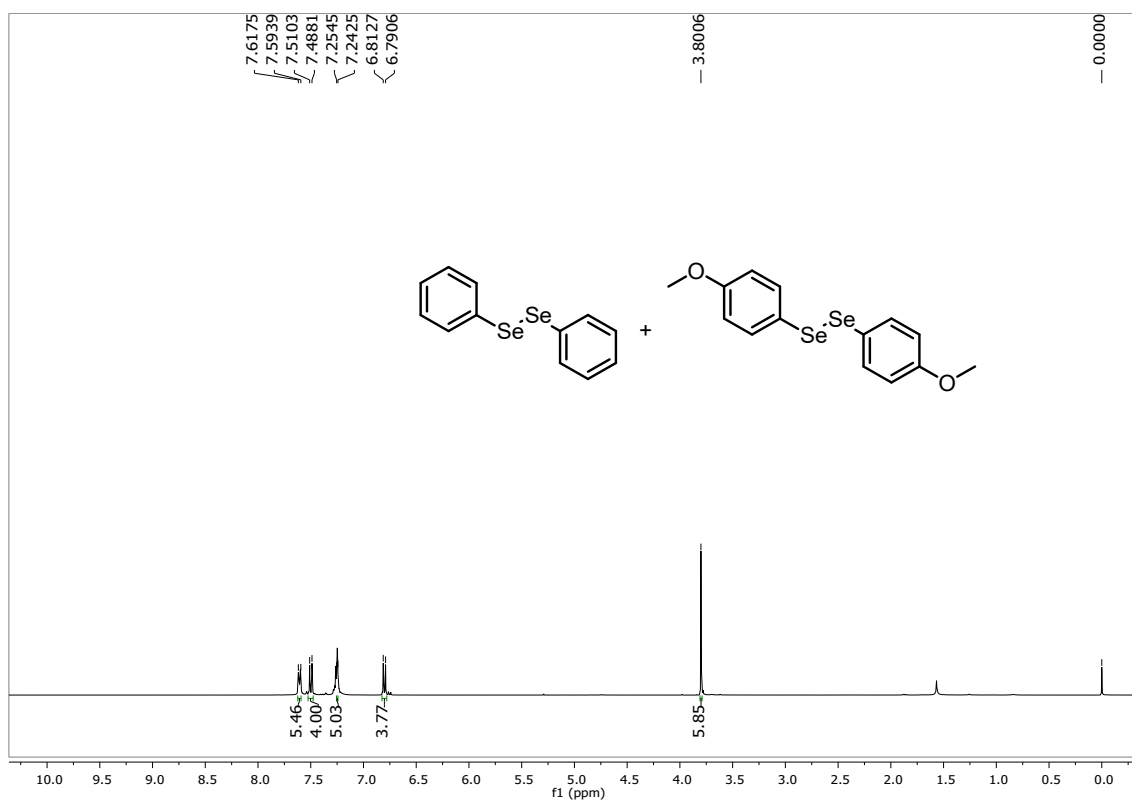

**Figure S15:** <sup>1</sup>H NMR (400 MHz, CDCl<sub>3</sub>) spectrum of (*p*-CH<sub>3</sub>OPhSe)<sub>2</sub> using a capillary of (PhSe)<sub>2</sub>.

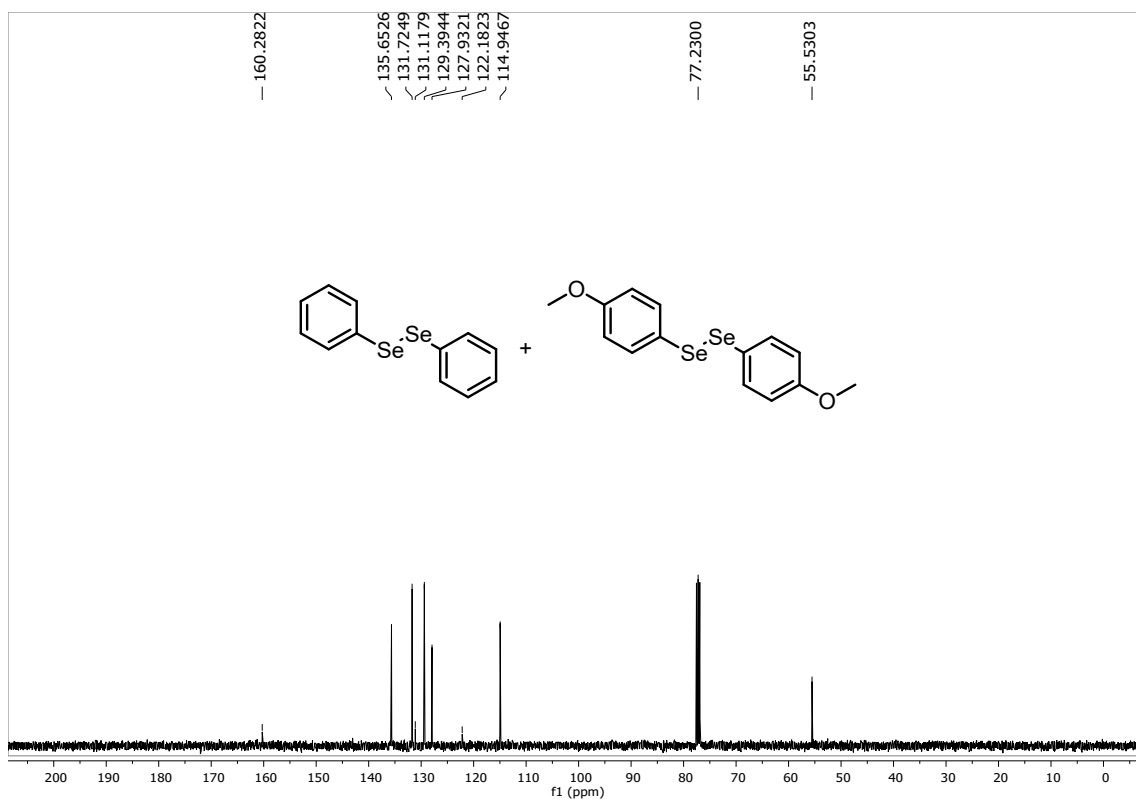

**Figur**

**e S16:** <sup>13</sup>C{<sup>1</sup>H} NMR (100 MHz, CDCl<sub>3</sub>) spectrum of (*p*-CH<sub>3</sub>OPhSe)<sub>2</sub> using a capillary of (PhSe)<sub>2</sub>.

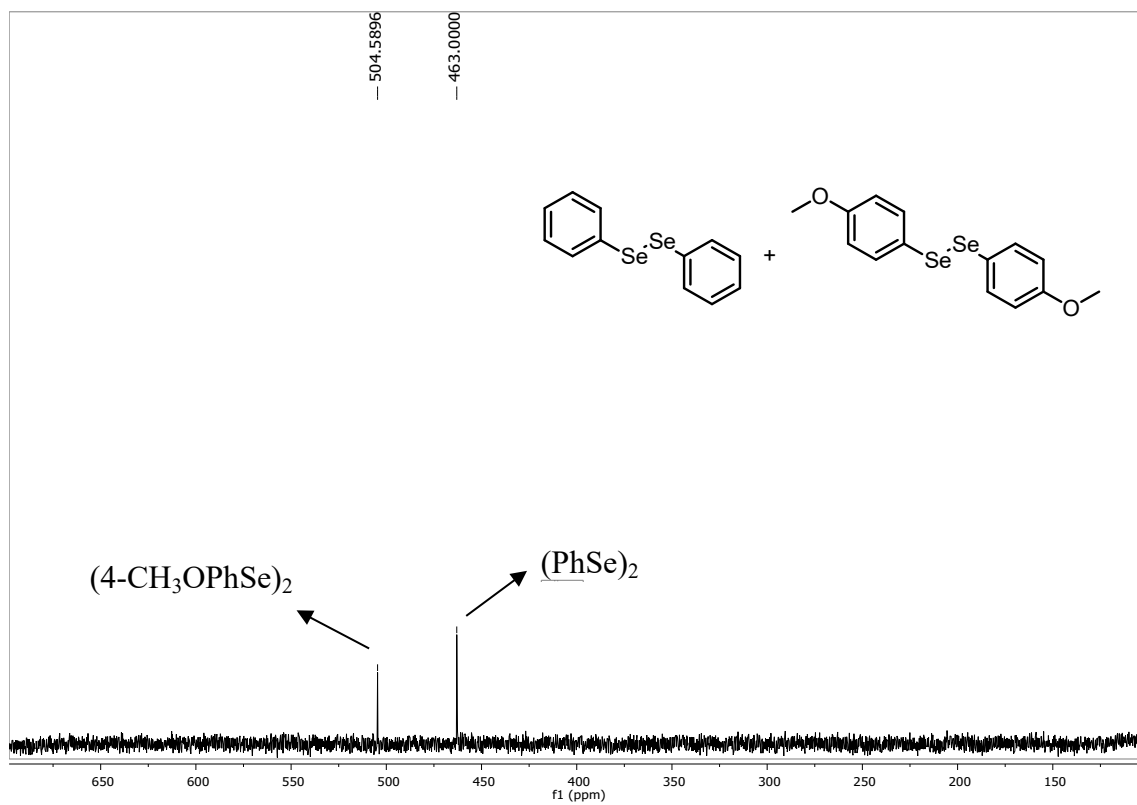

**Figure S17:**  $^{77}\text{Se}\{^1\text{H}\}$  NMR (76 MHz,  $\text{CDCl}_3$ ) spectrum of  $(p\text{-CH}_3\text{OPhSe})_2$  using a capillary of  $(\text{PhSe})_2$ .

*Cartesian Coordinates of gas phase optimized dimethylselenide and diphenyldiselenide*

**Me<sub>2</sub>Se**

|    |              |              |              |
|----|--------------|--------------|--------------|
| Se | 0.384500000  | 0.308000000  | -0.140800000 |
| C  | -0.593700000 | 1.851600000  | -0.790900000 |
| H  | -0.518300000 | 1.827100000  | -1.881500000 |
| H  | -1.646400000 | 1.792300000  | -0.502000000 |
| H  | -0.146000000 | 2.777600000  | -0.420400000 |
| C  | 0.093500000  | 0.590000000  | 1.755900000  |
| H  | -0.973300000 | 0.556200000  | 1.992900000  |
| H  | 0.602300000  | -0.229500000 | 2.270800000  |
| H  | 0.527600000  | 1.540700000  | 2.076800000  |

**Ph<sub>2</sub>Se<sub>2</sub>, open conformer**

|    |             |             |              |
|----|-------------|-------------|--------------|
| Se | 3.943900000 | 3.878500000 | 13.278200000 |
| Se | 5.197400000 | 1.989400000 | 12.792600000 |
| C  | 2.777400000 | 3.287900000 | 14.684900000 |
| C  | 1.747100000 | 2.379600000 | 14.436100000 |
| C  | 0.882600000 | 2.016700000 | 15.462200000 |
| C  | 1.030100000 | 2.568100000 | 16.732900000 |
| C  | 2.050600000 | 3.480600000 | 16.977700000 |
| C  | 2.929700000 | 3.837300000 | 15.958700000 |
| C  | 6.593700000 | 2.034400000 | 14.110600000 |
| C  | 6.605600000 | 1.064900000 | 15.114400000 |
| C  | 7.646800000 | 1.035800000 | 16.038200000 |
| C  | 8.668200000 | 1.977300000 | 15.970300000 |
| C  | 8.652900000 | 2.946800000 | 14.970200000 |
| C  | 7.623800000 | 2.973600000 | 14.036200000 |
| H  | 1.624000000 | 1.958400000 | 13.440900000 |
| H  | 0.081700000 | 1.305700000 | 15.264900000 |
| H  | 0.346900000 | 2.285900000 | 17.532100000 |
| H  | 2.172400000 | 3.913300000 | 17.969500000 |
| H  | 3.737500000 | 4.539800000 | 16.152500000 |
| H  | 5.799300000 | 0.337000000 | 15.174000000 |
| H  | 7.652700000 | 0.276600000 | 16.818800000 |
| H  | 9.479100000 | 1.956000000 | 16.696300000 |
| H  | 9.453500000 | 3.682600000 | 14.910300000 |
| H  | 7.617900000 | 3.723300000 | 13.248200000 |

**Ph<sub>2</sub>Se<sub>2</sub>, closed conformer**

|    |             |              |              |
|----|-------------|--------------|--------------|
| Se | 3.146100000 | 1.707000000  | 13.463300000 |
| Se | 5.131700000 | 2.270300000  | 14.443000000 |
| C  | 2.999400000 | -0.201000000 | 13.668500000 |
| C  | 1.963100000 | -0.800400000 | 12.949200000 |
| C  | 1.761900000 | -2.173000000 | 13.044500000 |
| C  | 2.590200000 | -2.951900000 | 13.846800000 |
| C  | 3.622000000 | -2.346200000 | 14.556400000 |
| C  | 3.829600000 | -0.972900000 | 14.473600000 |
| C  | 4.695400000 | 2.694700000  | 16.268700000 |
| C  | 3.475700000 | 2.411400000  | 16.873200000 |
| C  | 3.276800000 | 2.748000000  | 18.208500000 |



|   |             |              |              |
|---|-------------|--------------|--------------|
| C | 4.287400000 | 3.358200000  | 18.944500000 |
| C | 5.506200000 | 3.637000000  | 18.333600000 |
| C | 5.714200000 | 3.311500000  | 16.997900000 |
| H | 1.312600000 | -0.204100000 | 12.310400000 |
| H | 0.952800000 | -2.633900000 | 12.480000000 |
| H | 2.433000000 | -4.026400000 | 13.916500000 |
| H | 4.277000000 | -2.945700000 | 15.187000000 |
| H | 4.640100000 | -0.505000000 | 15.027600000 |
| H | 2.680900000 | 1.937700000  | 16.301700000 |
| H | 2.318500000 | 2.525800000  | 18.675800000 |
| H | 4.125600000 | 3.617900000  | 19.988800000 |
| H | 6.304500000 | 4.119200000  | 18.895700000 |
| H | 6.669600000 | 3.545100000  | 16.529300000 |

**Linear Correlation Between the Computed and Experimental Chemical Shift**

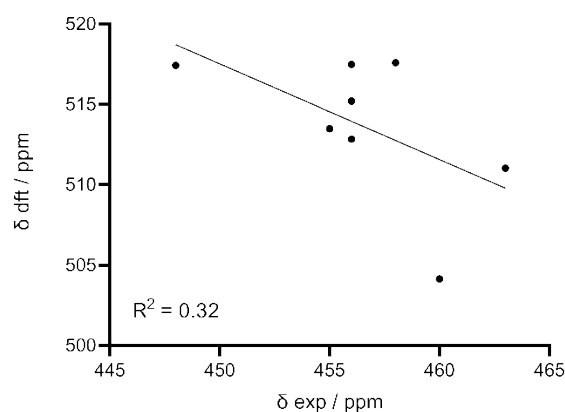

**Figure S18:** Linear correlation between the computed (COSMO-ZORA-OPBE/QZ4P-ae // ZORA-OPBE/TZ2P) and experimental chemical shift of diphenyl diselenide in solvents of different polarity.  $R^2$  is reported on the plot.

**Figure S19.** Open (left) vs closed (right) conformation of diphenyl diselenide (level of theory: ZORA-OPBE/TZ2P).

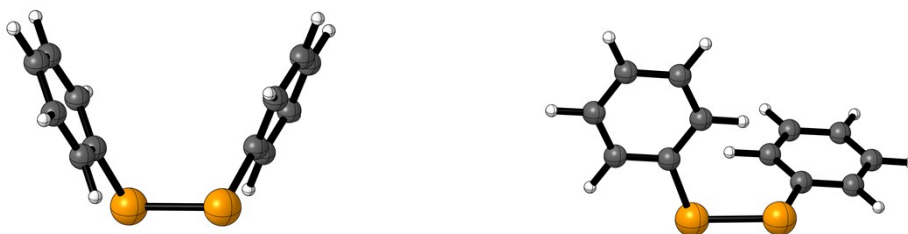

**Table S3.** Shielding constants for both Se (Se1 and Se2) nuclei and both conformations (open and close) in different solvents. COSMO-ZORA-OPBE/QZ4P-ae // ZORA-OPBE/TZ2P

|         |       | Se1     | Se2     |
|---------|-------|---------|---------|
| benzene | open  | 1112.71 | 1112.25 |
|         | close | 1312.63 | 1318.80 |
| cdcl3   | open  | 1116.96 | 1117.65 |
|         | close | 1320.60 | 1314.59 |
| cdco2d  | open  | 1118.87 | 1118.16 |
|         | close | 1314.90 | 1320.79 |
| thf     | open  | 1119.47 | 1118.70 |
|         | close | 1315.34 | 1321.29 |
| Py      | open  | 1120.75 | 1119.92 |
|         | close | 1315.87 | 1321.78 |
| CD3OD   | open  | 1122.45 | 1121.39 |
|         | close | 1316.08 | 1321.95 |
| cd3cn   | open  | 1122.50 | 1121.40 |
|         | close | 1316.24 | 1322.04 |
| dmso    | open  | 1122.36 | 1121.45 |
|         | close | 1322.25 | 1316.41 |
